# Supplementary material for: Roles of marine biota in the formation of atmospheric bioaerosols, cloud condensation nuclei, and ice-nucleating particles over the North Pacific Ocean, Bering Sea, and Arctic Ocean
Source: Copernicus journal article supplement (doi:10.5194/acp-2023-39), 2023-01-31
Supplement: Supplementary file [file acp-2023-39-AC1-supplement.pdf]

*Reviewer #1:*

*The article aims to relate certain marine bioindicators with aerosolised fluorescent particles and the presence of active aerosols such as CCN and INPs. It is interesting the analysis carried out in the different localities and how they are affected by different air masses that have a strong influence on the results obtained for bioaerosols. The article can be published if the following major and minor changes are made.*

We would like to thank the reviewer for providing valuable comments and comprehensive views on our work. Our responses are given below. All changes are shown in color in the revised manuscript.

*A. Major changes:*

*- Specify in the introduction, cruise observations and at the beginning of the corresponding section of the results, which bioindicators have been used. In the case of Chl-a, also add why was used it.*

For results of our studies, we have added which indicator we are referring to. We use Chl-a because it is generally used as an indicator of biological activity in a wide range of studies, including observational, satellite, and model studies, and it is easy to apply our equations to model predictions and comparison with other previous studies.

we added the sentences:

“Besides, chlorophyll a (Chl-a) is well known as a biological surrogate for predicting sea spray organic enrichment and commonly used as an input parameter to combine oceanic biology and atmospheric dynamics with WS (Rinaldi et al., 2013).” (Page 2, Lines 22-24).

“Future studies over different oceanic regions and seasons are required to comprehensively assess the association of bioaerosol evolution with Chl-a, which is derived from satellite observations and/or Earth system models as a proxy for phytoplankton biomass (Ito et al., 2023) and useful for input in model calculations as biological activity.” (Page 12, Lines 15-18).

*- The suggestion of new equations for the different calculations is good, but the components of each equation should be better explained, for example in the pag. 10.*

We rearranged previous sentences and added some discussion and implications so that the components in the estimated equations from this study are well explained, including comparisons with previous studies:

For Bioaerosols and bioindicators:

“The correlation coefficients are similar but the slope of the regression line for TEPs is 40% smaller than the case over the central Pacific Ocean (slope:  $0.076 \pm 0.014$ , R: 0.88, Kawana et al., 2021), suggesting the possibility of dependence on phytoplankton communities in the different oceanic regions (Taylor et al., 2014). Among the marine indicators, polysaccharides (TEPs) were reported as a major group of ocean-derived OM in seawater samples and SSAs during the ICEALOT cruise, and they might represent an important contributor to CCN in the

Arctic Ocean (Russell et al., 2010). Park et al. (2019) also found that TEPs correlated well with the number concentration of SSA particles ( $R: 0.86\text{--}0.99$ ) over the Arctic Ocean during summer; however, their analysis did not include bioaerosols. Considering that TEPs are not usually fluorescent, these results imply that TEPs aggregating fluorescent bacteria represent a major contributor to marine bioaerosols over the ocean (Russell et al., 2010; Engel et al., 2017; Park et al., 2019). CSP-containing particles may fluoresce due to their amino-acid structure and may simultaneously exhibit ice nucleating ability (Hill et al., 2014; Fröhlich-Nowoisky et al., 2016). Considering the correlation between fluorescent bioaerosols and CSP were lower ( $R: 0.5\text{--}0.6$ ) in our previous study over the Central Pacific, our results here for the high latitudes represent a successful case where the high correlation coefficients between them were found, suggesting the necessity of ocean-specific studies in the future. Furthermore, it is unique to find Chl-a as a good predictor (Eq. 4) of marine bioaerosols over high-latitude regions, in contrast to our previous result over the central Pacific Ocean that showed poor correlation (slope:  $20.0 \pm 19.0$ ,  $R: 0.47$ ). Nonetheless, the slopes for the two cases agree within the range of uncertainty. The good correlation of fluorescent bioaerosols and Chl-a in this study might partly be attributable to the strong correlation between Chl-a and TEPs or CSPs ( $R: 0.64\text{--}0.67$ ); the TEP/Chl-a ratio might vary depending on the key phytoplankton community (Engel et al., 2017). Future studies over different oceanic regions and seasons are required to comprehensively assess the association of bioaerosol evolution with Chl-a, which is derived from satellite observations and/or Earth system models as a proxy for phytoplankton biomass (Ito et al., 2023), is useful for input in model calculations as biological activity.” (Page 11, Line 27-Page 12, Line 18).

For CCN/INP activation in relation to bioindicators and bioaerosols:

“In the same region in November 2018, from a cruise track similar to that of R/V Mirai made 1 year earlier, Inoue et al. (2021) reported that INPs were detected at temperatures higher than  $-14\text{ }^{\circ}\text{C}$  in the Arctic at low altitudes when the aerosol particles were characterized by a high mass fraction of OC. Their meteorological analysis implied that marine-derived OM with sea salt was supplied to the atmosphere by high waves and strong winds. Several tank experiments and in situ observations using seawater samples obtained during periods of high biological activity suggested that high concentrations of TEPs and bacteria in the sea surface migrate and transfer to atmospheric aerosols and cloud water and become a major constituent of biogenic INPs at temperatures above  $-25\text{ }^{\circ}\text{C}$  (van Pinxteren et al., 2020, 2022; Santander et al. 2021, 2022; Mitts et al., 2021). The correlation between NCCN and bioindicators was also high (Figs. 7a–7c,  $R: 0.94\text{--}0.96$ ), indicating a significant contribution to the CCN number concentration by OM at the ocean surface with a wind-driven effect. In this study, the correlation coefficients between fine FAPs and CCN and INPs are higher than those of coarse FAPs in both cases. Our results suggest that OM originating from marine biota, consisting of relatively small particles less than  $2.5\text{ }\mu\text{m}$ , are released to the atmosphere as marine bioaerosols and

contribute to both CCN and INPs.“ (Page 16, Lines 7-19).

“In terms of fluorescence pattern, Type AB and Type ABC showed stronger correlation (R: 0.90–0.99 and 0.68–0.80), although their number fraction (10 % and 5 %, respectively) was lower than that of Type A and Type B (45 % and 24 %, respectively). The absolute density of Type AB or Type ABC was still more abundant than that of INPs, suggesting that only a certain proportion of fluorescent bioaerosols would activate as INPs. Following a study in Vancouver Island, Mason et al. (2015) also reported that particles that become active as INPs at a temperature of between  $-15$  and  $-25$  °C have a large contribution from biological particles, based on measurements of fluorescent particles with a WIBS-4A with high linear correlation (R: 0.83) between NINP,  $-25$ °C and FLall over a wide size range ( $D_p$ : 0.5–10  $\mu\text{m}$ ). This might be in accord with the results mentioned above that suggested that a large contribution of biological particles become active as INPs at high temperatures (from  $-10$  to  $-25$  °C) with marine biogenic sources in the remote ocean (Wilson et al., 2015; McCluskey et al., 2017, 2018b; Welti et al., 2020). Note that our analysis did not include particles smaller than 1  $\mu\text{m}$  owing to uncertainty of the fluorescence measurements, and the number concentration of fluorescent particles was an order of magnitude lower than that of Mason et al. (2015) in the middle latitudes.” (Page 16, Line 30- Page 17, Line 11).

*- In “Cruise Observations section 2.2”:*

*· it is not explained how the filters used for chemical or INP analysis are processed. Only for the INP analysis, a vague reference is made to two articles, but I suggest explaining briefly in the text how this was done in this study. So, please explain the processing of both kind of filters: quartz and polycarbonate membrane filters.*

We have added a detailed description of filter analysis for the chemical composition and INPs as follows:

“For the chemical analysis, the quartz filter was baked at  $900$ °C for the avoidance of the contamination and packed in the glass bottle before the observation (Taketani et al., 2022). Aliquots of each filter sample were used for the ionic chemical composition, EC/OC analysis, and Levoglucosan. The mass concentrations of ionic species ( $\text{NH}_4^+$ ,  $\text{Na}^+$ ,  $\text{K}^+$ ,  $\text{Ca}^{2+}$ ,  $\text{Mg}^{2+}$ ,  $\text{Cl}^-$ ,  $\text{NO}_3^-$ , and  $\text{SO}_4^{2-}$ ) were measured by ion chromatography (model: ICS-1000, Dionex Co., CA, USA), and the mass concentrations of sea salt and non-sea-salt sulfate ( $\text{nss-SO}_4^{2-}$ ) were calculated from  $\text{Na}^+$  assuming the standard seawater composition (Warneck, 2000). The mass concentrations of organic carbon (OC) and elemental carbon (EC) in the  $\text{PM}_{2.5}$  were also obtained using a thermal/optical carbon analyzer (model: DRI 2001, Desert Research Institute, Reno, NV, USA) with the Interagency Monitoring of Protected Visual Environments protocol, and the mass concentrations of water-insoluble organic carbon were derived by subtraction of the measured water-soluble organic carbon from the total OC. Levoglucosan was analyzed using a derivatization gas chromatography mass spectrometer (model: GCMS-QP2010Plus, Shimadzu Co., Kyoto, Japan).” (Page 6, Lines 9-20).

“A polycarbonate filter ( $\phi$ : 47 mm) was immersed into MilliQ purified water to prepare a suspension of particle. Then using the particle-containing water droplets with a volume of 5  $\mu$ L, the number concentrations of INPs upon immersion freezing were obtained using the National Institute of Polar Research Cryogenic Refrigerator Applied to Freezing Test (Tobo, 2016). From the detections made between 0 and  $-30$   $^{\circ}$ C with a 0.5  $^{\circ}$ C step, the number concentrations of INPs determined at three selected temperatures ( $-18$ ,  $-24$ , and  $-30$   $^{\circ}$ C) were used for analysis in this study. The detailed extraction and analysis procedures for INP measurements are described elsewhere (Tobo, 2016; Tobo et al., 2020).” (Page 6, Lines 23-29).

*· I also recommend to specify where the TEPs and CSPs analyses were done: on the ship or in the laboratory after the campaign? If they were conducted in the laboratory after the campaign, how the samples were conserved until their processing? Moreover, in the line 30 when it's specified “after 1 min”, what do you mean: after 1 min of each rinsed time or what specifically?*

We filtered seawater and extracted for organic matter and stained on board the ship and analyzed them in the laboratory. We added the details of the processing.

“Surface seawater sampling for TEPs and CSPs was performed using a bucket at 22 sampling stations. In analysis of CSPs, 200 mL of seawater was filtered through a Nuclepore™ polycarbonate membrane filter (cut size: 0.4  $\mu$ m, Cytiva, Tokyo, Japan) and triplicate filters were obtained from each seawater sample on the ship just after sampling. 1 mL Coomassie brilliant blue staining solution was added to the filter, which was then rinsed five times with 1 mL of Milli-Q® water after 1 min of staining. The filters for CSPs were stored at  $-40$   $^{\circ}$ C in a freezer. For TEPs, water samples were added formalin to a final concentration of 1% (v/v) after sampling and preserved in a refrigerator ( $4^{\circ}$ C). TEPs samples were then filtered in the laboratory in the same manner as CSPs samples. In the laboratory analysis for TEPs, 1 mL of Alcian blue staining solution, adjusted to pH 2.5, was added to the filter and the filter was rinsed three times with 1 mL of Milli-Q® water after 4 s of staining. filter samples for TEPs were soaked for 2 h in 6 mL of 80 % sulfuric acid for extraction and absorbance was measured at the wavelength of 787 nm (Alldredge and Passow, 1993). For CSPs, 1 mL Coomassie brilliant blue staining solution was added to the filter, which was then rinsed five times with 1 mL of Milli-Q® water after 1 min of staining. Filter samples were soaked for 2 h in 4 mL of 3 % sodium dodecyl sulfate in 50 % isopropyl alcohol with ultrasonic extraction to elute the dye, and the absorbance of the solution was measured at the wavelength of 615 nm (Cisternas-Novoa et al., 2015).” (Page 7, Lines 4-18)

*· Also, how much seawater was used for Chl-a and nutrient analyses?*

We added a description of the amount of seawater used for Chl-a and nutrient analysis.

“Seawater samples collected from the surface were filtered (500 mL ) onto 25 mm Whatman GF/F glass-fiber filters and extracted with N, N-dimethylformamide to determine concentrations

of Chl-a using a fluorometer (model: 10-AU, Turner Designs, Inc., San Jose, USA). Seawater samples (10 mL) were collected and used for nutrient analysis using a continuous segmented flow analyzer (model: QuAAtro 2-HR, BL TEC K.K., Tokyo, Japan).” (Page 7, Lines 23-27)

*- Figure 2: please also include the representation of the different periods P1-P5 at the top of the right section (figs. 2e, 2f, 2g) to better see the intervals of the values. And add in the caption of the figure, the abbreviations used in the graphs, so that reader doesn't need to look up the meaning every time in the text.*

We corrected as suggested in the revised manuscript.

*- Figure 3: when this figure is explained in the text (pag. 8, lines: 10-13), it is stated that figs. 3c and 3d also show Chl-a dispersion, but they only show the dispersion of TEP (3c) and CSP (3d). Please modify it. Also in the text, it's a bit confusing when the average values are mentioned, since the Chl-a values are included. In general, the structure of the paragraph is not very clear. Could it be possible to specify better the results, mentioning the correct figs and restructuring a bit the order of the values? For example, figs 3c and 3d are commented before than 3a and 3b.*

The order of the description has been revised: the explanation of Chl-a (Fig. 3a) is first, followed by the temporal variation of TEP and CSP (Fig. 3b) and the geographic distribution (Figs. 3c and 3d).

“Temporal variations of Chl-a and biological organic gel particles (TEPs and CSPs) in the surface seawater are shown in Fig. 3a and 3b. The concentration of Chl-a was high in the North Pacific Ocean and the Bering Sea (mean values  $\pm$  one standard deviation ( $1\sigma$ ):  $0.86 \pm 0.23 \text{ mg m}^{-3}$ ), coincident with high nutrient contents (Fig. S1), suggesting high biological activity (e.g., a phytoplankton bloom). The particular organic matter as TEPs and CSPs were also relatively high in the North Pacific Ocean and the Bering Sea (mean values  $\pm 1\sigma$ :  $73 \pm 34 \mu\text{g XGeq L}^{-1}$  and  $24 \pm 22 \mu\text{g BSAeq L}^{-1}$ , respectively), following the trend of Chl-a. The spatial distributions of TEPs and CSPs are also presented in Fig. 3c and 3d. Particularly, high concentrations of bioindicators (i.e., TEPs, CSPs) were observed from the Bering Sea to the Chukchi Sea (P2 and P4, Figs. 3c–d), corresponding to changes in nutrient concentrations. Conversely, over the Arctic Ocean, the concentration of CSPs decreased markedly to  $12 \pm 13 \mu\text{g BSAeq L}^{-1}$ , while TEPs and Chl-a maintained relatively high concentrations ( $47 \pm 10 \mu\text{g XGeq L}^{-1}$  and  $0.33 \pm 0.12 \text{ mg m}^{-3}$ , respectively) in comparison with those previously reported during summer (August–September) (Park et al., 2019, TEPs:  $\sim 20 \mu\text{g XGeq L}^{-1}$ , CSPs:  $\sim 20 \mu\text{g BSAeq L}^{-1}$ , and Chl-a:  $\sim 0.2 \text{ mg m}^{-3}$ ).” (Page 9, Lines 2-13)

*- Pag 10: Line 2: Could you specify a reference where the DNA staining method is conducted? Or did you do this analysis? If yes, could you include it in the results or supplementary section?*

The DNA-staining method described here is based on our previous study (Kawana et al., 2021)

and it was not obtained in this study.

“Our previous oceanographic observations over the central Pacific (Kawana et al., 2021) similarly showed that FAPs in Type A and Type C predominated (75 %) in clean remote oceanic air masses, and that their abundance correlated well with oceanic TEPs (polysaccharide polymer) and bacteria, when considering the influence of WS in the formation of SSAs, while FAPs in Type B were dominant (30 %) near land and strongly correlated with CSPs (protein-like polymers). The identity of marine bioaerosols detected by fluorescence observations was certified by comparison to a DNA staining method during our previous research cruise (Kawana et al., 2021).” (Page 10, Lines 21-27)

*- Page 11: The results obtained with CSPs are not discussed. Please add a brief summary.*

We added discussion for CSPs, in addition to TEPs. We added the following sentence.

“CSP-containing particles may fluoresce due to their amino-acid structure and may simultaneously exhibit ice nucleating ability (Hill et al., 2014; Fröhlich-Nowoisky et al., 2016). Considering the correlation between fluorescent bioaerosols and CSP were lower (0.5–0.6) in our previous study over the Central Pacific, our results here for the high latitudes represent a successful case where the high correlation coefficients between them were found, suggesting the necessity of ocean-specific studies in the future.” (Page 12, Lines 6-10)

*- Section 3.4: Lines 2 and 3. Please make a revision of the text, since the commented values for the fig. 6 do not appear to be the same as those represented. In addition, the highest peaks are for P4 and P5 and not for P1 as indicated in the text.*

We believe that averages over log-normal distributions in the plots were correctly explained in the previous text. However, for conciseness we omitted the plots and corresponding texts in revision.

*- Figure 7: Graphs a) and e) represent the same data. Would it be possible to delete one of them? It is a bit confusing. Also, specify the meaning of the abbreviation “AS” in the figure caption.*

We would like to keep both figures to show overall temporal variation patterns in Fig. 6a (changed from Fig.7a) and their averages over the five periods segregated by air mass types in Fig. 6e (changed from Fig.7e). We added the meaning “AS” in the figure caption as suggested.

*- Section 3.5: Pag 15: it is sometimes difficult to follow in the text to which graphs the mentioned values refer. I would recommend adding the figure or table number in brackets after each explanation of the values in the text. Similar happens for figure 9 in page 16, it's not commented or specified the values. Furthermore, fig 9. shows all fluorescent particles together and does not distinguish between fine and coarse, whereas it can be deduced from the text that fig 9.*

*Shows them separately. Please, explain it better.*

In section 3.5, We have added to the description which values correspond to the figure and table number in brackets. Fig 8 (originally Fig.9) plots the INP number concentration against all fluorescent particles in the fine mode to generate the relationship equation. The coarse mode particles were not included here due to low correlation. We added the additional explanation in the caption of Fig.8.

“Scatterplot of total fluorescent fine particles ( $1 < D_p < 2.5 \mu\text{m}$ , sum of types A, B, C, AB, AC, BC, and ABC) and INP number concentrations measured at temperatures higher than  $-18$ ,  $-24$ , and  $-30 \text{ }^\circ\text{C}$ . (Page 43)

*- A list of abbreviations is necessary.*

We added the list of abbreviations as an appendix in the revised manuscript.

*B. Minor changes:*

*• Abstract:*

*Last line of abstract, change "contributed" by "point", "define".*

We kept the word "contributed" because we thought it was more appropriate.

*• Introduction:*

*Pag 4:*

*- Line3: specify in brackets what bioindicators you go to analyse: TEP, CSP and Chla. If it's the first time that Chl-a is mentioned, also write the complete word.*

We corrected as suggested in the revised manuscript.

*• Results and Discussion:*

*Pag 7:*

*- Line 26: where are represented the plots of mass concentrations of OM and Na+ mentioned in the text? Specify it in parenthesis.*

This plot was not included in the manuscript because it was for reference information and we omitted this description in the revised manuscript.

*- Line 28: could you mention a brief explanation why the OC, sulfate and sea salt were found in the period P4?*

We added the following sentence.

“During P4, OC, sulfate, and sea salt were dominant (15, 31, and 43 %, respectively), suggesting marine influence with relatively high biological activity in this period.”

(Page 8, Lines 19-20)

*Pag 8:*

- Line 20: What do you mean by "in this area"? Do you mean the P2 and P4 periods? It is not clear.

- Line: 28: same as in line 20 when mentioning: "in this period".

We added the following sentences, respectively.

"In the Bering Sea and the Chukchi Sea, ..." (Page 9, Line 14)

"during P2, P3, and P4, ...." (Page 9, Line 23)

Pag 14:

- Line 25: the word "elsewhere" can refer to literally another place. Please specify whether it refers to another place on land, marine...

We corrected as suggested in the revised manuscript.

"pristine marine  $N_{INP}$  values are approximately one order of magnitude lower than in the North Pacific Ocean" (Page 15, Lines 6-7)

• *Conclusions:*

Pag 19: You explain the periods P1-P4, but you forgot to mention the P5. Could you add something about this period?

There were a few descriptions for P5 because of the number of observation points were limited. But upon revision, we added some more results here together with P1 as the influence of Asian continental and terrestrial air masses was common.

"During P1 and P5 over the North Pacific Ocean, largely influenced by long-range transport from terrestrial regions including the Asian continent, particle chemical compositions were characterized by high mass fractions of Organics and sulfate (15–22 % and 28–48 %, respectively). In contrast, during P2, P3, and P4 over the Bering Sea and the Arctic Ocean, mainly influenced by maritime air masses, high mass fractions of sea salt (43–88 %) were noted." (Page 18, Line 28-Page 19, Line 3)

*C. Typographical corrections:*

1. *Introduction:*

Pag.2:

- Line 11, change "and" by "or"

We corrected as suggested in the revised manuscript.

- Line 17: full stop after the parenthesis.

We corrected as suggested in the revised manuscript.

- Line: 19: close parenthesis after TEP; When you mention "microlayer" at the end of the line, which one do you mean, "microlayer of water"? Specify it.

We changed the word "microlayer" as "sea surface microlayer" in the revised manuscript.



(Page 2, Line 20)

*Pag.3:*

*- Line: 6: change “biomaterials” by “biological organisms”*

We changed the word “biomaterials” to “microorganism and biological substances“ in the revised manuscript. (Page 3, Line 10)

*- Line 21: in the Mediterranean Sea there is another study where INPs are analysed. It was carried out on an island in the Mediterranean Sea. Then, if you are referring to analyses carried out on a ship, don't mention it, but if you are referring to other analyses of bioparticles of marine origin where INP was analysed, mention that too.*

*The reference is: Tang, K., Sánchez-Parra, B., Yordanova, P., Wehking, J., Backes, A. T., Pickersgill, D. A., Maier, S., Sciare, J., Pöschl, U., Weber, B., and Fröhlich-Nowoisky, J.: Bioaerosols and atmospheric ice nuclei in a Mediterranean dryland: community changes related to rainfall, *Biogeosciences*, 19, 71–91, <https://doi.org/10.5194/bg-19-71-2022>, 2022*

We added a reference (Tang et al., 2022) in the revised manuscript.

*Pag 4:*

*- Line 1: add a “s” to word “cycle”.*

We corrected as suggested in the revised manuscript.

*Pag 10:*

*- Line 16: Rewrite it, specifying that the high correlation appears for “most” of bioindicators, or mention that” for TEP is lower than for CSP and Chl-a”.*

Although examined, we could not catch the point of the reviewer's comment. We believe that this part adequately described correlation coefficients between bioaerosols and sea-surface biological parameters.

*- Lines 24 and 25: “the correlation coefficients were almost unchanged when an exponent of 2 was used instead of 1 (see Table 2)”. Do you mean between which values? Be a little more specific.*

We corrected explanations in the revised manuscript as follows:

“when the wind effect was considered as the square of WS ( $WS^2$ ), high correlation coefficients were also obtained (Table 2,  $R$ : 0.87–0.90).” (Page 11, Lines 19-20)

*2. Cruise Observations:*

*Pag: 4*

*-Line: 9: add a “s” to “measurement”*

We corrected as suggested in the revised manuscript.

*Pag 5*

*specify what is  $d_p$  and what is referred as “dry” and “wet” in the equation.*

We added the following sentences:

“In the calculation of  $\kappa_{CCNC}$ , the  $d_{act}$  was applied as  $d_{p,dry}$  and the particle diameter in humidified conditions was assumed as  $d_{p,wet}$ , and the S was applied as the SS conditions in the observation.” (Page 5, Lines 23-24)

*Pag 7*

*-Line 5: delete the brackets after “respectively”.*

We corrected as suggested in the revised manuscript.

*3. Results and discussion:*

*Pag 9:*

*- Line 11: at the end of the line is said that “...representing 2.5%” Is this value correct? Wouldn't you mean 25%? If it's correct, in the line 20, is the value 7% correct too? Please, revise it.*

We doublechecked that the original values (2.5% and 7%, respectively) are correct.

*- Line 15: add after “marine biogenic source” the following: “(according to our bioindicators analysis)”.*

We corrected as suggested in the revised manuscript.

*Pag 10:*

*- Line 15: add “fluorescent” before the word “particles”*

We corrected as suggested in the revised manuscript.

*- Line 26: change “marine” by “fluorescent” or add “fluorescent” between “marine” and “bioaerosols”.*

We corrected as suggested in the revised manuscript.

*Pag 11:*

*- Line 8: delete “(with bacteria, in some cases)”. You don't have evidence of this in the present study.*

We corrected as suggested in the revised manuscript.

*- Line 15: change “formation” by “detection”*

We corrected the word “formation” as “evolution” in the revised manuscript.

*- Line 29: change “study” by “studies”*

We corrected as suggested in the revised manuscript.

*Pag 12:*

*- Line 15: it seems that there is an extra space between "Ocean" and "during". Delete the space.*

We deleted the space as suggested in the revised manuscript.

*Pag 14:*

*- Line 19: change Fig. "8d" by "7d"*

*- Line 20: change Fig "7e" by "7d"*

We corrected as suggested in the revised manuscript.

We now numbered as Figs.6d, 6e, and 6f, because the original Fig 6 has been deleted in the revised manuscript.

*Pag 15:*

*- Line 11: change Table "2" by "3"*

We corrected as suggested in the revised manuscript.

*- Line 26: after "...and strong winds" make a full stop.*

We corrected as suggested in the revised manuscript.

*4. Conclusions:*

*Pag 19, Line 9: delete "i.e" as you only analysed the three mentioned bioindicators (TEP, CSP and Chl-a) and no more.*

We kept the word "i.e."; there might be confusion with "e.g."

*Reference:*

Ito, A., Y. Miyazaki, F. Taketani, Y. Iwamoto, and Y. Kanaya: Marine aerosol feedback on biogeochemical cycles and the climate in the Anthropocene: lessons learned from the Pacific Ocean. *Environ. Sci.: Atmos.*, <https://doi.org/10.1039/D2EA00156J>, 2023.

Kawana, K., Matsumoto, K., Taketani, F., Miyakawa, T., and Kanaya, Y.: Fluorescent biological aerosol particles over the central Pacific Ocean: covariation with ocean surface biological activity indicators, *Atmos. Chem. Phys.*, 21, 15969–15983, <https://doi.org/10.5194/acp-21-15969-2021>, 2021.

Rinaldi, M., S. Fuzzi, S. Decesari, S. Marullo, R. Santolero, A. Provenzale, J. von Hardenberg, D. Ceburnis, A. Vaishya, C. D. O'Dowd, and M. C. Facchini.: Is chlorophyll-a the best surrogate for organic matter enrichment in submicron primary marine aerosol?, *J. Geophys. Res. Atmos.*, 118, doi:10.1002/jgrd.50417, 2013.

Tang, K., Sánchez-Parra, B., Yordanova, P., Wehking, J., Backes, A. T., Pickersgill, D. A., Maier, S., Sciare, J., Pöschl, U., Weber, B., and Fröhlich-Nowoisky, J.: Bioaerosols and atmospheric ice nuclei in a Mediterranean dryland: community changes related to rainfall, *Biogeosciences*, 19, 71–91, <https://doi.org/10.5194/bg-19-71-2022>, 2022.
